## 1     **The scent of the fly**

2     Paul G. Becher<sup>1</sup>, Sebastien Lebreton<sup>1</sup>, Erika Wallin<sup>2</sup>, Erik Hedenström<sup>2</sup>, Felipe Borrero<sup>3</sup>,  
3     Marie Bengtsson<sup>1</sup>, Volker Jörger<sup>4</sup>, Peter Witzgall<sup>1\*</sup>

4     <sup>1</sup>Department of Plant Protection Biology, Swedish University of Agricultural Sciences, Box  
5     102, 23053 Alnarp, Sweden

6     <sup>2</sup>Department of Chemical Engineering, Mid Sweden University, Holmgatan 10, 85170  
7     Sundsvall, Sweden

8     <sup>3</sup>Biological Control Laboratory, Colombian Corporation of Agricultural Research, AA  
9     240142 Las Palmas, Bogota, Colombia

10    <sup>4</sup>Staatliches Weinbauinstitut, Merzhauserstr. 119, 79100 Freiburg, Germany

11    \*Correspondence: Peter Witzgall, SLU, Box 102, 23053 Alnarp, Sweden  
12    phone +46 70 2426939, peter.witzgall@slu.se

## 13    **Abstract**

14    (Z)-4-undecenal (Z4-11Al) is the volatile pheromone produced by females of the vinegar  
15    fly *Drosophila melanogaster*. Female flies emit Z4-11Al at a few nanograms per hour, for  
16    long-range and species-specific communication and mate-finding. Tests with synthetic  
17    Z4-11Al show that it has a characteristic scent, which we perceive even at the small  
18    amounts produced by a female fly. Since only females produce Z4-11Al, and not males,  
19    we can reliably distinguish between single *D. melanogaster* males and females, according  
20    to their scent. A wine-tasting panel finds that we sense as little as 1 ng of synthetic Z4-  
21    11Al in a glass of wine, and 10 ng Z4-11Al is perceived as a loud odour. This corroborates  
22    the observation that a glass of wine is spoiled by a single *D. melanogaster* fly falling into it,  
23    and we here show that is caused by the off-flavour Z4-11Al. The biological role of Z4-  
24    11Al or structurally related aldehydes in humans and the basis for this semiochemical  
25    convergence remains yet unclear.

## 26 **Keywords**

27 pheromone, semiochemical, odorant, off-flavour, olfaction, wine

## 28 **Introduction**

29 All living things communicate with chemicals. Unlike sounds or sights, chemicals  
30 interconnect species across the kingdoms, and enable information exchange between  
31 animals, plants and microorganisms (Schultz and Appel 2004). A fascinating, recurrent  
32 observation is that the same compound is bioactive in different species and context. This  
33 evolutionary convergence of semiochemicals may be due to their physico-chemical  
34 properties but is first of all expected to reflect their biological significance, including the  
35 underlying biochemical pathways and precursors.

36 Linalool, for example, is found in foliage, flowers and fruit of many plants. Herbivore  
37 infestation leads to augmented production of linalool, which helps plants to repel aphids  
38 and other herbivores (Mithöfer and Boland 2012). Release of the enantiomers, (R)- and  
39 (S)-linalool, differs among plant parts and changes during phenological development;  
40 they play different roles in attraction of pollinators and herbivores, for feeding and  
41 oviposition (Okamoto et al. 2007; Reisenman et al. 2010; Saveer et al. 2012; Raguso  
42 2016; Pragadheesh et al. 2017).

43 A background of plant-produced airborne linalool enhances mate-finding and pheromone  
44 response in some plant-feeding species, while other insects produce linalool as a sex  
45 pheromone component (Hefetz et al. 1979; Aldrich et al. 1986; Leal et al. 1993; Yang et al.  
46 2004; Ju et al. 2017). In mammals, linalool induces psychopharmacological effects via  
47 glutamate receptors (Elisabetsky et al. 1995; Nakamura et al. 2009); perception via  
48 odorant receptors (Ors) produces a sweet, floral note that makes a prominent  
49 contribution to the bouquet of flowers, fruit (Pichersky et al. 1994; Lewinsohn et al.  
50 2001) and wine, where both grape and yeast are a source of linalool (Carrau et al. 2005;  
51 Swiegers et al. 2005).

52 Citrus fruit is a preferred oviposition substrate for the fruit fly *Drosophila melanogaster*  
53 (Dweck et al. 2013), provided that yeast is present (Becher et al. 2012; Gorter et al.  
54 2016). Both citrus peel and brewer's yeast produce linalool (Chisholm et al. 2003; Carrau  
55 et al. 2005). The flies perceive linalool via several Ors, including Or69a, and they are  
56 attracted to it (Hallem et al. 2004; Dweck et al. 2013; Lebreton et al. 2017).  
57 Interestingly, the Or69a olfactory channel encodes not only linalool, but also the recently  
58 identified fly pheromone (Z)-4-undecenal (Z4-11Al) (Lebreton et al. 2017), which is also  
59 found in citrus peel (Chisholm et al. 2003).

60 During volatile collections from pheromone-releasing *D. melanogaster* flies, we  
61 discovered that we can reliably distinguish single male from female flies by their smell  
62 and that this smell is strongly reminiscent of synthetic Z4-11Al. We therefore employed a  
63 sensory panel to verify whether we can indeed sense the pheromone emanating from  
64 single *D. melanogaster* females, and whether the newly discovered pheromone Z4-11Al  
65 contributes to the scent of the female fruit fly.

## 66 **Methods**

### 67 **Chemicals**

68 Isomeric purity of synthetic (*Z*)-4-undecenal (Z4-11Al) was 98.6% and chemical purity  
69 >99.9%, according to gas chromatography coupled to mass spectrometry (6890 GC and  
70 5975 MS, Agilent technologies Inc., Santa Clara, CA, USA). Ethanol (redistilled, >99.9%  
71 purity; Merck, Darmstadt, Germany) was used as solvent.

### 72 **Sensory evaluation**

73 Eight members (2 women, 6 men) of the sensory panel for organoleptic tests for the  
74 wine-growing area of Baden (Germany) evaluated the odour of *D. melanogaster* flies and  
75 synthetic Z4-11Al. Each test comprised three visually identical glasses, control and two  
76 treatments, which were presented in random order. The panel was asked to score odour  
77 intensity, ranging from 1 (weak, silent) to 9 (strong, loud) and to comment on differences  
78 in odour quality between the three glasses. The first test compared single male and  
79 female flies. Flies were kept singly during 5 min in empty wine tasting glasses (215 ml),  
80 they were released before tests. The second test compared synthetic Z4-11Al and a glass  
81 impregnated with the odour of a single female fly, Z4-11Al (10 ng in 10 µl ethanol) was  
82 applied to an empty glass and the solvent was allowed to evaporate during 2 min. Next,  
83 10 ng Z4-11Al diluted in ethanol or a female fly were added to a glass filled with either  
84 water or white wine (dry Pinot blanc, Freiburg 2013, Staatsweinkellerei Freiburg). The fly  
85 was removed after 5 min, prior to testing. Finally, 1 or 5 ng Z4-11Al was added to wine.

### 86 **Statistical analysis**

87 Odor panel data was analyzed using one-tailed analysis of variance (ANOVA) followed by  
88 a Tukey test. Normality was tested using Shapiro-Wilk and homoscedasticity was tested  
89 using Levene's test. All analysis were carried out using SPSS v. 20 (IBM Corp, 2011).

## 90 Results and Discussion

91 *D. melanogaster* female flies (Figure 1) produce a distinctive scent. The sensory panel  
92 found the odour of single female flies to be stronger and qualitatively clearly different  
93 from single male flies (Fig. 2a).

94 Chemical analysis has shown earlier that Z4-11Al (Lebreton et al. 2017) and its  
95 biosynthetic precursor, the cuticular hydrocarbon (Z,Z)-7,11-heptacosadiene, are  
96 produced by female flies, not by males (Billeter et al. 2009). Our panel tests establish  
97 that synthetic Z4-11Al has a distinctive odour (Fig. 2b). Moreover, a female fly and 10 ng  
98 Z4-11Al were found to be similar, with respect to odour quality and intensity, when  
99 presented in an empty glass, in water or wine (Fig. 2c, d, e). Since the wine panel  
100 perceived 10 ng Z4-11Al as slightly louder than the odour of a single fly, we compared  
101 Z4-11Al at 1 ng and 5 ng, showing that as little as 1 ng of Z4-11Al was clearly  
102 perceptible (Fig. 2f). Even at small amounts, Z4-11Al was perceived as a somewhat  
103 unpleasant off-flavour.

104 The detection threshold for Z4-11Al is apparently in the same order in flies and men,  
105 since we clearly sense Z4-11Al released from a single fly (Fig. 2a). Chemical analysis  
106 found that *D. melanogaster* females released Z4-11Al at a rate of 2.4 ng/h in a glass  
107 aeration apparatus and solvent extracts of the fly cuticula contained 0.3 ng Z4-  
108 11Al/female (Lebreton et al. 2017). We cannot exclude that other fly volatiles, including  
109 saturated and unsaturated aldehydes contribute to our perception of fly odour. However,  
110 Z4-11Al is the most abundant compound found only in effluvia of female flies, whereas  
111 other, structurally related compounds are released by both sexes (Lebreton et al. 2017).

112 Taken together, the sensory panel corroborated our initial observation that we sensitively  
113 smell Z4-11Al, the female-produced pheromone of the fruit fly *D. melanogaster* (Lebreton  
114 et al. 2017) and that we can reliably distinguish single female from male flies. This  
115 validates the observation that one fly spoils a glass of wine, after falling into it - provided  
116 it is of the female sex.

117 An explanation for the convergent perception of Z4-11Al in flies and men is, however, not  
118 at hand. The occurrence of Z4-11Al in nature is certainly incompletely known and a  
119 possible biological role in humans remains unclear. In addition to *D. melanogaster* flies,  
120 Z4-11Al has also been found in citrus peel (Chisholm et al. 2003) and in the anal gland of  
121 the rabbit, perception of Z4-11Al leads to changes in rabbit heart rate (Goodrich et al.  
122 1978).

123 Colonies of crested auklet, a seabird, produce a characteristic citrus-like scent, which we  
124 sense from far (Douglas et al. 2001). Two unsaturated aldehydes, including (Z)-4-  
125 decenal (Z4-10Al) are main constituents of this bird-produced odour (Douglas et al.  
126 2001). In crested auklet, Z4-10Al likely plays a role as an ectoparasite repellent and a

127 signal of mate quality (Douglas et al. 2001; Caro & Balthazart 2010). (*E*)-2-nonenal is  
128 another odour-active unsaturated aldehyde, found in mushrooms and wine (Wood et al.  
129 1994; Chatonnet & Dubourdieu 1998; Ferreira et al. 2004).

130 The olfactory sense in animals plays a key role during habitat adaptation. Tuning of Ors  
131 to habitat cues is thought to create a bias for mate-finding signals that match or are  
132 structurally related to habitat- and resource-associated odorants (Endler 1992;  
133 Boughman & Svanbäck 2017). This idea yields a tentative scenario for the convergence of  
134 semiochemicals. All animals, including the vinegar fly and ourselves, have long been  
135 associated with yeasts that facilitate digestion of plant materials, provide nutrients and  
136 protection of food from antagonistic microorganisms. Unsaturated aldehydes may have  
137 initially signalled presence of fruit and yeast, leading to conspecific aggregations at  
138 feeding sites. Structurally similar aldehydes, derived from fatty acid biosynthesis in  
139 animals, may then have been secondarily adopted as mating signals via established  
140 sensory channels.

141 The phylogenetic divergence of Ors, including the Or69a channel, which is dedicated to  
142 Z4-11Al in the *Drosophila* clade, is accessible to investigation of the underlying molecular  
143 and physiological mechanisms (Lebreton et al. 2017). A current research challenge is to  
144 further develop studies of odorant perception and phylogenetic divergence in animals and  
145 to improve our understanding of the chemical vocabulary that interconnects us with other  
146 living things.

## 147 **Acknowledgements**

148 We gratefully acknowledge participation of the members of the sensory panel for  
149 organoleptic tests for the wine-growing area of Baden (Germany). We thank Cyrus  
150 Mahmoudi (comgraphix.de) for sharing a fruit fly picture.

## 151 **Compliance with ethical standards**

## 152 **Funding**

153 This study was supported by the Linnaeus initiative "Insect Chemical Ecology, Ethology  
154 and Evolution" (The Swedish Research Council Formas, SLU), Carl Tryggers Stiftelse för  
155 Vetenskaplig Forskning (Stockholm) and the Swedish University of Agricultural Sciences  
156 (LTV Faculty). EW and EH were supported by the European Regional Development Fund  
157 and the County Board of Västernorrland.

158 **Conflict of interest**

159 **References**

- 160 Aldrich JR, Lusby WR, Kochansky JP (1986) Identification of a new predaceous stink bug  
161 pheromone and its attractiveness to the eastern yellowjacket. *Cell Molec Life Sc*  
162 42:583-585. doi: 10.1007/BF01946714
- 163 Becher PG, Flick G, Rozpedowska E, Schmidt A, Hagman A, Lebreton S, Larsson MC,  
164 Hansson BS, Piskur J, Witzgall P, Bengtsson M (2012) Yeast, not fruit volatiles  
165 mediate attraction and development of the fruit fly *Drosophila melanogaster*. *Funct*  
166 *Ecol* 26:822-828. doi:10.1111/j.1365-2435.2012.02006.x
- 167 Billeter JC, Atallah J, Krupp JJ, Millar JG, Levine JD (2009) Specialized cells tag sexual  
168 and species identity in *Drosophila melanogaster*. *Nature* 461:987-U250.  
169 doi:10.1038/nature08495.
- 170 Boughman JW, Svanbäck R (2017) Synergistic selection between ecological niche and  
171 mate preference primes diversification. *Evolution* 71:6–22. doi:10.1111/evo.13089
- 172 Caro SP, Balthazart J (2010). Pheromones in birds: myth or reality? *J Comp Physiol A*  
173 196:751-766. doi: 10.1007/s00359-010-0534-4
- 174 Carrau FM, Medina K, Boido E, Farina L, Gaggero C, Dellacassa E, Versini G, Henschke PA  
175 (2005) De novo synthesis of monoterpenes by *Saccharomyces cerevisiae* wine  
176 yeasts. *FEMS Microbiol Lett* 243:107–15. doi: 10.1016/j.femsle.2004.11.050
- 177 Chatonnet P, Dubourdieu D (1998). Identification of substances responsible for the  
178 'sawdust' aroma in oak wood. *J Sc Food Agric* 76:179-188. doi: 10.1002/(SICI)1097-  
179 0010(199802)76:2<179::AID-JSFA924>3.3.CO;2-Y
- 180 Chisholm MG, Jell JA, Cass DM (2003) Characterization of the major odorants found in  
181 the peel oil of *Citrus reticulata* Blanco cv. Clementine using gas chromatography-  
182 olfactometry. *Flavour Fragrance J* 18:275–281. doi: 10.1002/ffj.1172
- 183 Douglas H, Jones T, Conner W (2001) Heteropteran chemical repellents identified in the  
184 citrus odor of a seabird (crested auklet: *Aethia cristatella*): evolutionary convergence  
185 in chemical ecology. *Naturwissenschaften* 88:330-332. doi: 10.1007/s001140100236
- 186 Dweck HK, Ebrahim SA, Kromann S, Bown D, Hillbur Y, Sachse S, Hansson BH, Stensmyr  
187 MC (2013) Olfactory preference for egg laying on citrus substrates in *Drosophila*.  
188 *Curr Biol* 23:2472–80. doi: 10.1016/j.cub.2013.10.047
- 189 Elisabethsky E, Marschner J, Souza DO (1995) Effects of linalool on glutamatergic system  
190 in the rat cerebral cortex. *Neurochem Res* 20:461-465. doi: 10.1007/BF00973103
- 191 Endler JA (1992) Signals, signal conditions, and the direction of evolution. *Am Naturalist*  
192 139:S125-S153. doi: 10.1086/285308
- 193 Ferreira V, Culleré L, López R, Cacho J (2004). Determination of important odor-active  
194 aldehydes of wine through gas chromatography–mass spectrometry of their O-(2, 3,  
195 4, 5, 6-pentafluorobenzyl) oximes formed directly in the solid phase extraction

- 196 cartridge used for selective isolation. J Chromatogr A, 1028:339-345. doi:  
197 10.1016/j.chroma.2003.11.104
- 198 Goodrich BS, Hesterman ER, Murray KE, Mykytowycz R, Stanley G, Sugowdz G (1978)  
199 Identification of behaviorally significant volatile compounds in the anal gland of the  
200 rabbit, *Oryctolagus cuniculus*. J Chem Ecol 4:581-594. doi: 10.1007/BF00988922
- 201 Gorter JA, Jagadeesh S, Gahr C, Boonekamp JJ, Levine JD, Billeter JC (2016) The  
202 nutritional and hedonic value of food modulate sexual receptivity in *Drosophila*  
203 *melanogaster* females. Sci Rep 6:19441. doi: 10.1038/srep19441
- 204 Hallem EA, Ho MG, Carlson JR (2004) The molecular basis of odor coding in the  
205 *Drosophila* antenna. Cell 117:965-79. doi: 10.1016/j.cell.2004.05.012
- 206 Hefetz A, Batra SWT, Blum MS (1979). Linalool, neral and geranial in the mandibular  
207 glands of *Colletes* bees - an aggregation pheromone. Cell Molec Life Sc 35:319-320.  
208 doi: 10.1007/BF01964324
- 209 Ju Q, Guo XQ, Li X, Jiang XJ, Jiang XG, Ni WL, Qu MJ (2017) Plant volatiles increase sex  
210 pheromone attraction of *Holotrichia parallela* (Coleoptera: Scarabaeoidea). J Chem  
211 Ecol 43:236-242. doi: 10.1007/s10886-017-0823-2
- 212 Leal WS, Sawada M, Matsuyama S, Kuwahara Y, Hasegawa M (1993) Unusual periodicity  
213 of sex pheromone production in the large black chafer *Holotrichia parallela*. J Chem  
214 Ecol 19:1381-1391. doi: 10.1007/BF00984883
- 215 Lebreton S, Borrero-Echeverry F, Gonzalez F, Solum M, Wallin E, Hedenström E, Hansson  
216 BS, Gustavsson A-L, Bengtsson M, Birgersson G, Walker WB, Dweck H, Becher PG,  
217 Witzgall P (2017) A *Drosophila* female pheromone elicits species-specific long-range  
218 attraction via an olfactory channel with dual specificity for sex and food. BMC Biology  
219 15:88. doi:10.1186/s12915-017-0427-x
- 220 Lewinsohn E, Schalechet F, Wilkinson J, Matsui K, Tadmor Y, Nam KH, Amar O,  
221 Lastochkin E, Larkov O, Ravid U, Hiatt W, Gepstein S, Pichersky E (2001) Enhanced  
222 levels of the aroma and flavor compound S-linalool by metabolic engineering of the  
223 terpenoid pathway in tomato fruits. Plant Physiol 127:1256-1265. doi:  
224 10.1104/pp.010293
- 225 Mithöfer A, Boland W (2012) Plant defense against herbivores: chemical aspects. Annu  
226 Rev Plant Biol 63:431-450. doi: 10.1146/annurev-arplant-042110-103854
- 227 Nakamura A, Fujiwara S, Matsumoto I, Abe K (2009) Stress repression in restrained rats  
228 by (R)-(-)-linalool inhalation and gene expression profiling of their whole blood cells.  
229 J Agric Food Chem 57:5480-5485. doi: 10.1021/jf900420g
- 230 Okamoto T, Kawakita A, Kato M (2007) Interspecific variation of floral scent composition  
231 in *Glochidion* and its association with host-specific pollinating seed parasite  
232 (*Epicephala*). J Chem Ecol 33:1065-1081. doi: 10.1007/s10886-007-9287-0
- 233 Pichersky E, Raguso RA, Lewinsohn E, Croteau R (1994) Floral scent production in *Clarkia*  
234 (Onagraceae) (I. Localization and developmental modulation of monoterpene  
235 emission and linalool synthase activity). Plant Physiol 106:1533-1540.
- 236 Pragadheesh VS, Chanotiya CS, Rastogi S, Shasany AK (2017) Scent from *Jasminum*  
237 *grandiflorum* flowers: investigation of the change in linalool enantiomers at various

- 238 developmental stages using chemical and molecular methods. *Phytochemistry*  
239 140:83-94. doi: 10.1016/j.phytochem.2017.04.018
- 240 Raguso RA (2016) More lessons from linalool: insights gained from a ubiquitous floral  
241 volatile. *Curr Op Plant Biol* 32:31-36. doi: 10.1016/j.pbi.2016.05.007
- 242 Reisenman CE, Riffell JA, Bernays EA, Hildebrand JG (2010) Antagonistic effects of floral  
243 scent in an insect-plant interaction. *Proc R Soc B* 277:2371-2379. doi:  
244 10.1098/rspb.2010.0163
- 245 Saveer AM, Kromann S, Birgersson G, Bengtsson M, Lindblom T, Balkenius A, Hansson BS,  
246 Witzgall P, Becher PG, Ignell R (2012) Floral to green: mating switches moth  
247 olfactory coding and preference. *Proc R Soc B* 279:2314-2322. doi:  
248 10.1098/rspb.2011.2710
- 249 Schultz JC, Appel HM (2004) Cross-kingdom cross-talk: hormones shared by plants and  
250 their insect herbivores. *Ecology* 85:70-77. doi: 10.1890/02-0704
- 251 Swiegers JH, Bartowsky EJ, Henschke PA, Pretorius IS (2005) Yeast and bacterial  
252 modulation of wine aroma and flavour. *Austral J Grape Wine Res* 11:139-173. doi:  
253 10.1111/j.1755-0238.2005.tb00285.x
- 254 Wood WF, Brandes ML, Watson RL, Jones RL, Largent DL (1994) trans-2-Nonenal, the  
255 cucumber odor of mushrooms. *Mycologia* 4:561-563. doi: 10.2307/3760750
- 256 Yang Z, Bengtsson M, Witzgall P (2004) Host plant volatiles synergize response to sex  
257 pheromone in codling moth, *Cydia pomonella*. *J Chem Ecol* 30:619-629. doi:  
258 10.1023/B:JOEC.0000018633.94002.af

## 259 Legends

260 **Fig. 1** Fruit fly *D. melanogaster* female with exposed ovipositor on blueberry (Picture by  
261 Cyrus Mahmoudi).

262 (colour & high resolution version available).

263 **Fig. 2** Sensory evaluation of fly odor and synthetic (Z)-4-undecenal (Z4-11Al) according  
264 to a sensory panel of eight. Odor intensity scale ranges from 1 (weak) to 9 (strong).  
265 Symbols show evaluation by individual test panel members, mean intensity ratings  
266 followed by different letters are significantly different ( $p < 0.001$ ). Olfactory intensity of (a)  
267 the odour of a single *D. melanogaster* male and female fly adsorbed during 5 min in an  
268 empty wine glass ( $F=96.711$ ), (b) 10 ng synthetic Z4-11Al and solvent (ethanol)  
269 ( $F=106.732$ ), (c) 10 ng Z4-11Al and the odour of a single *D. melanogaster* female fly in  
270 an empty glass ( $F=34.720$ ), (d) in a glass with water ( $F=16.689$ ), (e) in a glass with wine  
271 ( $F=12.952$ ), (f) 1 ng and 5 ng Z4-11Al in a glass with wine ( $F=110.694$ ).



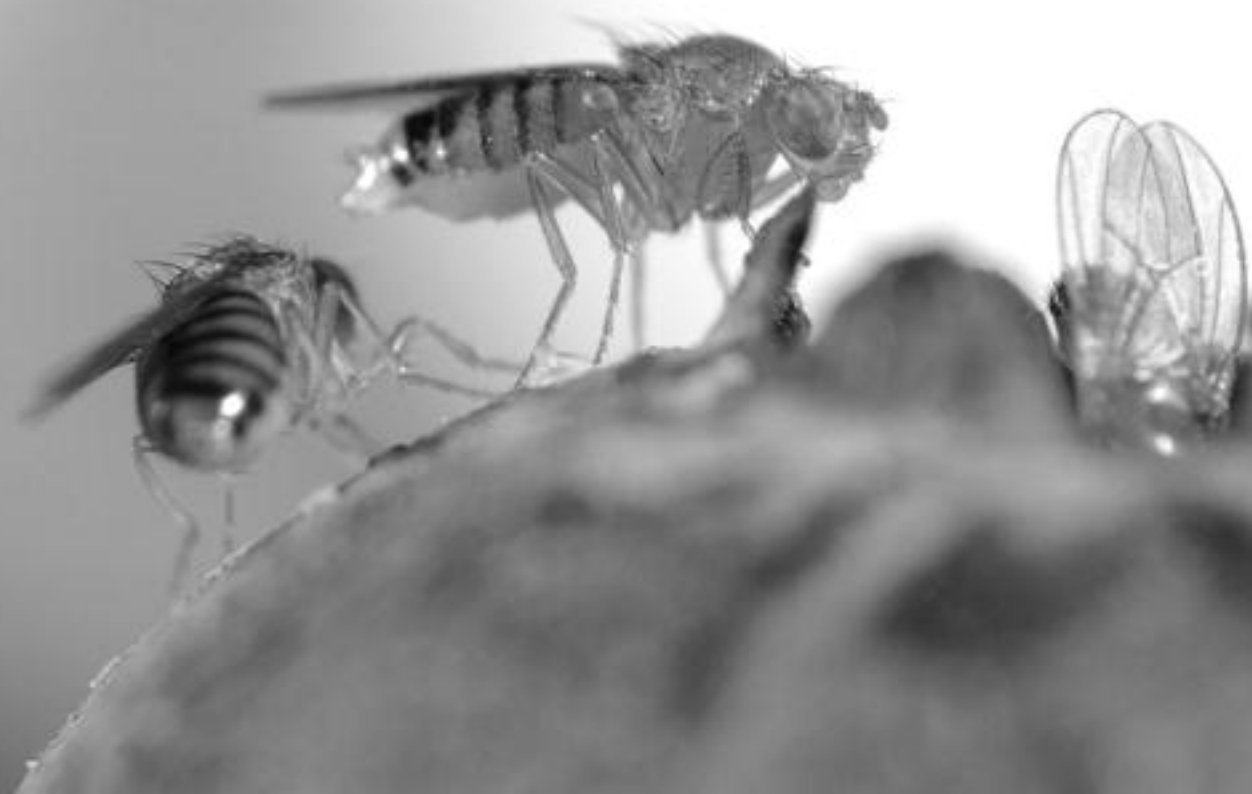

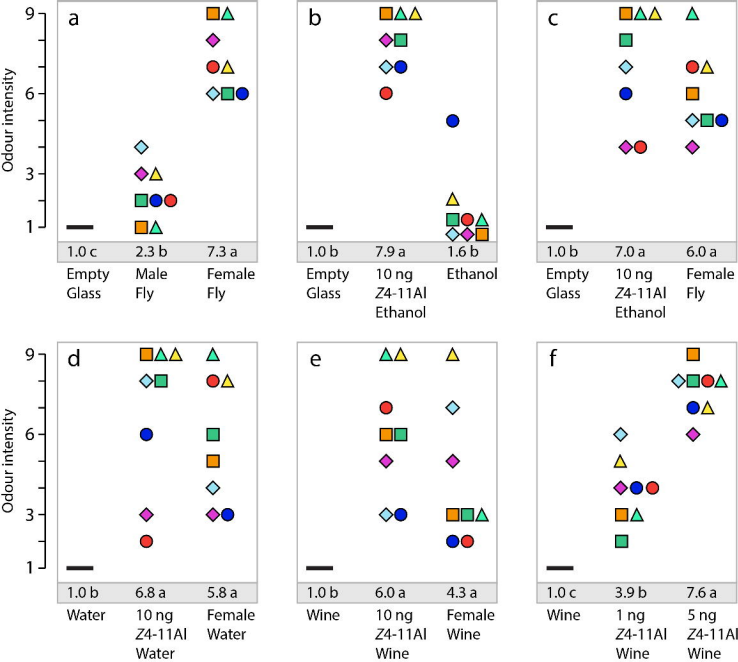

Source: https://www.biorxiv.org/content/10.1101/206375v1.full.pdf
